# Supplementary material for: Combining mKate2-Kv1.3 Channel and Atto488-Hongotoxin for the Studies of Peptide Pore Blockers on Living Eukaryotic Cells
Source: MDPI journal article supplement (doi:10.3390/toxins14120858), 2022-12-05
Supplement: s1 [file s1]

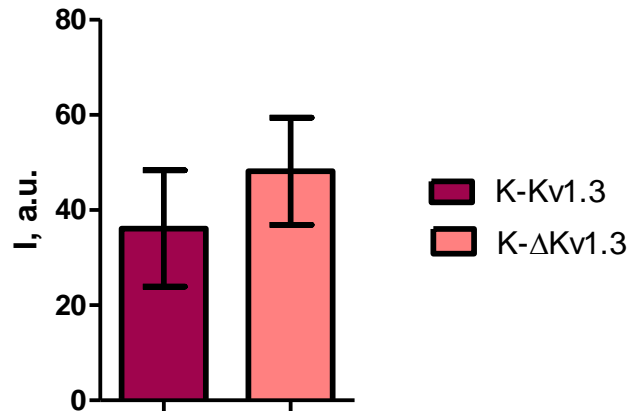

**Figure S1.** Comparison of fluorescence intensities of K-Kv1.3 and K-ΔKv1.3 expressed in membrane of HEK293 cells. Intensities were measured with confocal microscopy using the same parameters and treated with Image J software as described in the Results section. Data were averaged (mean  $\pm$  SD,  $n = 20$ ;  $p = 0.47$ ) for each channel.

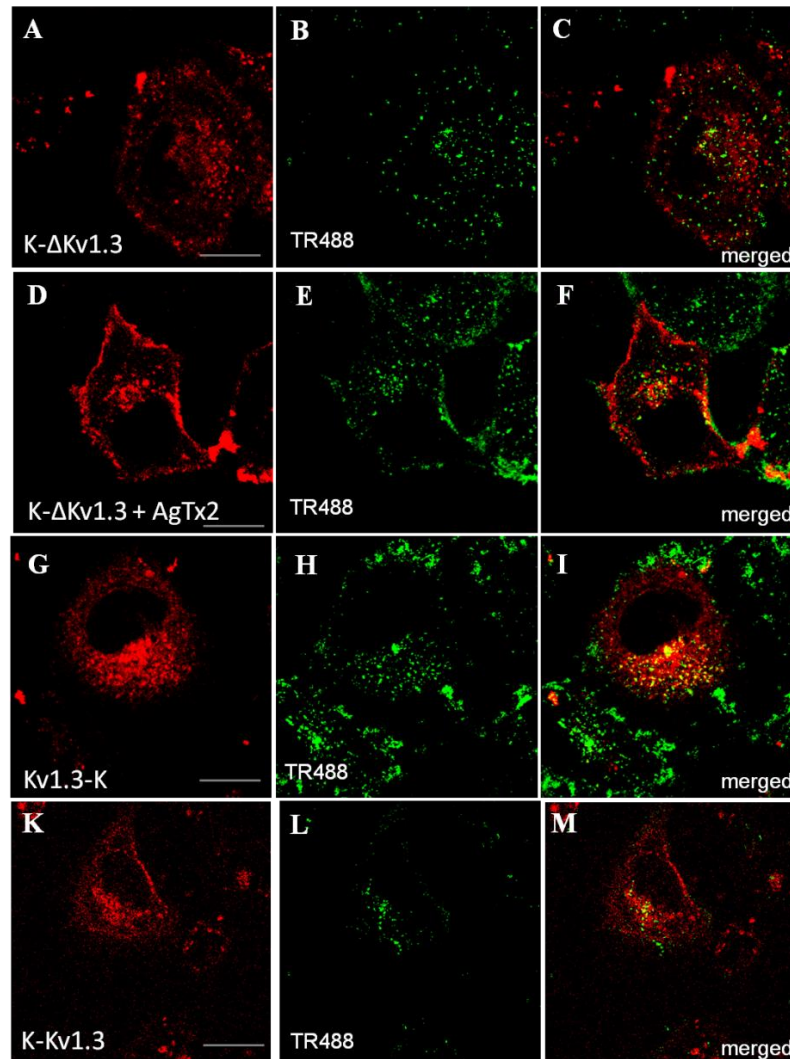

**Figure S2.** Distribution of mKate2-tagged Kv1.3 (red) and the endosome marker TR488 (green) in living HEK293 cells. (A-C), (D-F) Cells expressing K-ΔKv1.3. (D-F) Cells were co-incubated with agitoxin 2 (AgTx2, 100 nM, 30 min) and TR488. (G-I) Cells expressing Kv1.3-K. (J-M) Cells expressing K-Kv1.3. (C,F,I,M) Merged images of mKate2-tagged Kv1.3 and TR488 fluorescence. Yellow color indicates co-localization of the channels and ERTG in endosomes. Scale bar: 20  $\mu$ m.

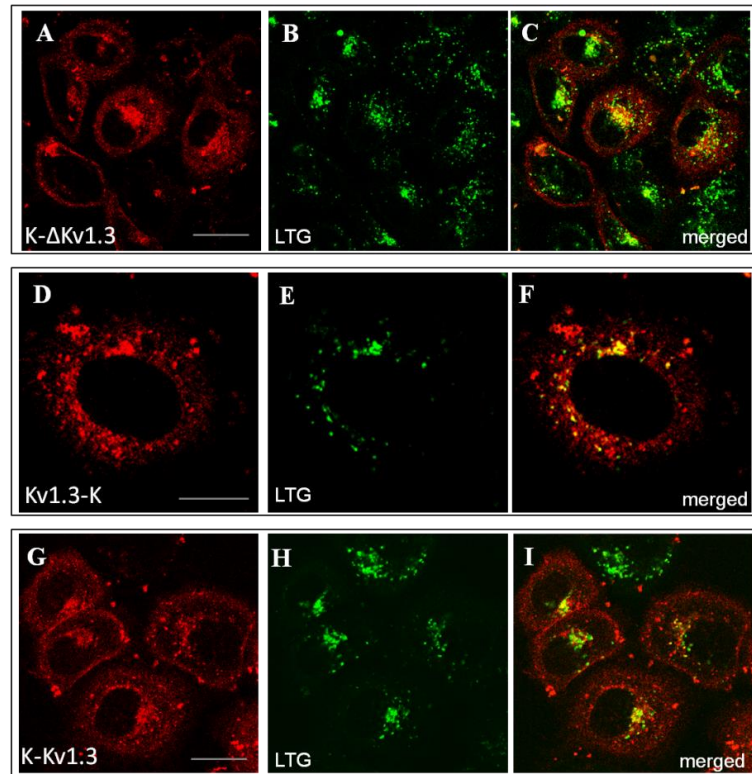

**Figure S3.** Distribution of mKate2-tagged Kv1.3 (red) and the lysosome marker LTG (green) in living HEK293 cells. (A-C) Cells expressing K-ΔKv1.3. (D-F) Cells expressing Kv1.3-K. (G-I) Cells expressing K-Kv1.3. (C,F,I) Merged images of mKate2-tagged Kv1.3 and LTG fluorescence. Yellow color indicates co-localization of the channels and LTG in lysosomes. Scale bar: 20  $\mu$ m.

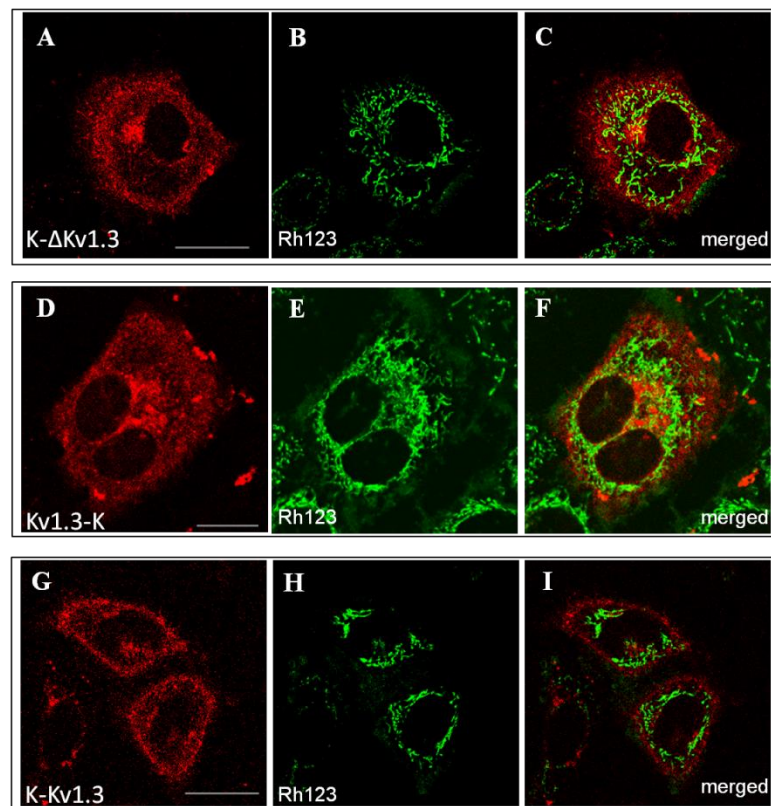

**Figure S4.** Distribution of mKate2-tagged Kv1.3 (red) and the mitochondrion marker Rh123 (green) in living HEK293 cells. (A-C) Cells expressing K-ΔKv1.3. (D-F) Cells expressing Kv1.3-K. (G-I) Cells expressing K-Kv1.3. (C,F,I) Merged images of mKate2-tagged Kv1.3 and Rh123 fluorescence. Scale bar is 20  $\mu$ m.

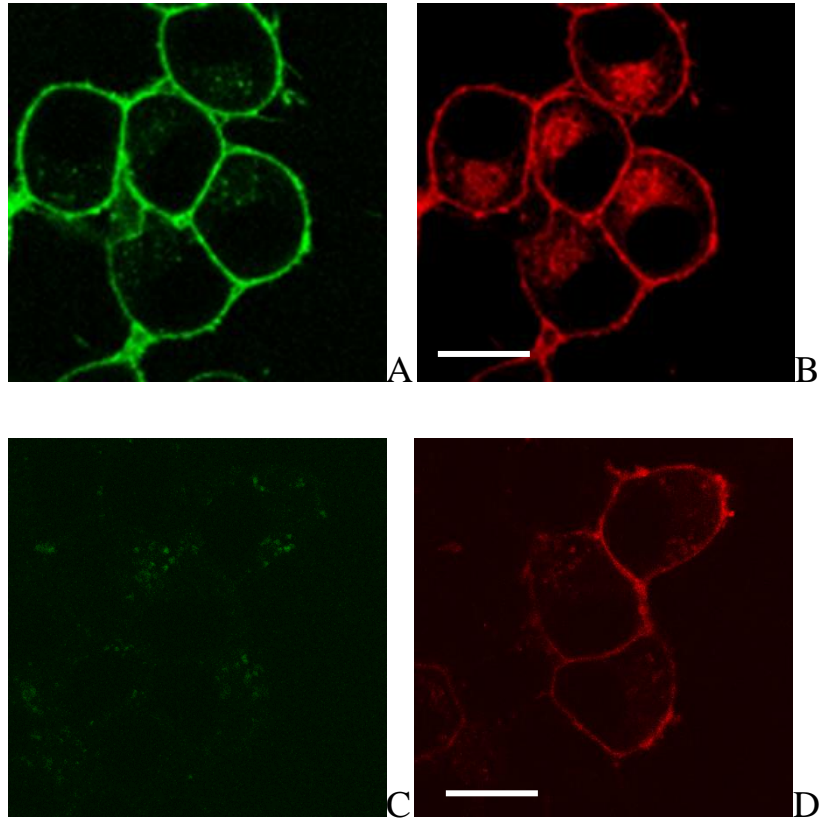

**Figure S5.** Confocal imaging of A-HgTx interactions with K-ΔKv1.3 channels transiently expressed in Neuro-2A cells. (A, B) Distribution of A-HgTx (2 nM) bound at the membrane of cells expressing K-ΔKv1.3. (C,D) Displacement of A-HgTx (2 nM) with HgTx (20 nM) from the complexes with K-ΔKv1.3 at the membrane of cells. Scale bar is 20  $\mu\text{m}$ . Green and red colors – fluorescence of A-HgTx and K-ΔKv1.3, respectively.

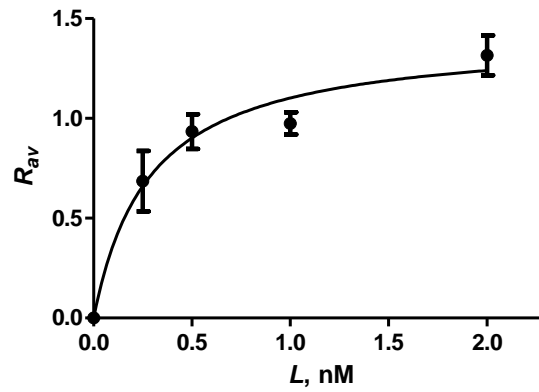

**Figure S6.** Concentration dependence of A-HgTx binding to K-Kv1.3 on a cell membrane that was measured as the dependence of  $R_{av}$  on the concentration  $L$  of A-HgTx added to HEK293 cells transiently transfected with K-Kv1.3.
